# Evolution of sex-biased gene expression during transitions to separate sexes in the *Silene* genus

## Authors

Djivan Prentout<sup>1,‡\*</sup>, Aline Muyle<sup>2,‡</sup>, Niklaus Zemp<sup>3</sup>, Adil el Filali<sup>4</sup>, Bastien Boussau<sup>4</sup>, Pascal Touzet<sup>5</sup>, Alex Widmer<sup>6</sup>, Jos Käfer<sup>7</sup>, Gabriel A.B. Marais<sup>\*4,8,9,10</sup>

## Affiliations

1 - Department of Biological Sciences, Columbia University, New York, USA

2 - Centre d'Ecologie Fonctionnelle et Evolutive (CEFE), University of Montpellier, CNRS, 34 EPHE, IRD, Montpellier, France.

3 - Genetic Diversity Centre (GDC), ETH, Zürich, Switzerland

4 - Université de Lyon, Université Lyon 1, CNRS, Laboratoire de Biométrie et Biologie Evolutive UMR 5558, 69622 Villeurbanne, France

5 - CNRS, UMR 8198 – Evo-Eco-Paleo, Univ. Lille, F-59000 Lille, France

6 - Institute of Integrative Biology, ETH Zurich, Zurich, Switzerland

7 - ISEM, Univ Montpellier, CNRS, IRD, Montpellier, France

8. CIBIO, Centro de Investigação em Biodiversidade e Recursos Genéticos, InBIO, Laboratório Associado, Campus de Vairão, Universidade do Porto, 4485-661 Vairão, Portugal.

9. Departamento de Biologia, Faculdade de Ciências, Universidade do Porto, 4099-002, Porto, Portugal.

10. BIOPOLIS Program in Genomics, Biodiversity and Land Planning, CIBIO, Campus de Vairão, 4485-661 Vairão, Portugal.

\* corresponding authors ([djp2179@columbia.edu](mailto:djp2179@columbia.edu); [gmarais@cibio.up.pt](mailto:gmarais@cibio.up.pt))

‡ These authors contributed equally to this work

## 46 **Abstract**

47 Sexual dimorphism is widespread among species with separate sexes and its extent is  
48 thought to be governed by the differential expression of thousands of genes between males  
49 and females (known as Sex-Biased Genes, hereafter SBGs). SBGs have been studied in  
50 numerous species, but rarely in a comparative way, which curtails our understanding of  
51 their evolution, especially during multiple independent transitions to separate sexes. We  
52 sequenced the transcriptomes of nine dioecious species, two gynodioecious species  
53 (separate females and hermaphrodites) and two hermaphrodite species from the *Silene*  
54 genus. Our dataset provides access to three independent transitions to dioecy (dating from  
55 less than 1 Myo to about 11 Myo). We demonstrated that male-biased expression emerges  
56 first during a transition to separate sexes, later followed by female-biased genes.  
57 Furthermore, we showed that, despite a mixture of selective regimes, positive selection  
58 significantly affects the evolution of some SBGs. Overall, this study provides new insights  
59 on the causes of SBG evolution during transitions to separate sexes.

## 60 **Teaser**

61 This study describes the evolution of sex-biased gene expression during a transition to  
62 separate sexes in plants.

63  
64

## 65 **MAIN TEXT**

66  
67 **Introduction**  
68

69 Separate sexes (i.e. gonochorism in animals and dioecy in plants) is the sexual system of 95% of  
70 animals and 5% of flowering plants (1–3). The differences in the phenotypes of males and  
71 females (called sexual dimorphism) can affect the physiology, morphology, and other life history  
72 traits (4–7). The strength of sexual dimorphism varies widely between species and can be more  
73 important than phenotypic differences between individuals of the same sex (8). In several species  
74 with genetic sex determination, only one or two genes are sufficient to determine the sex of  
75 individuals (9, 10). The sex determining genes then lead to the activation of a regulatory cascade  
76 where both transcription factors and hormones determine the differential expression of up to  
77 thousands of genes between males and females. The genes that are differentially expressed  
78 between males and females, the so-called Sex-Biased Genes (SBGs), are common in dioecious  
79 plants (from 2 to 17% of all expressed genes) and are distributed along the entire genome (11–  
80 14). Sex-Biased Gene Expression (SBGE) has been extensively described in several animals and  
81 to a lesser extent in some plant species (discussed in (8, 15)). Previous studies have shown that  
82 the proportion of SBGs could vary significantly among tissues and developmental stages (7, 12,  
83 16).

84 Despite numerous analyses of SBGE conducted to date, very few have been done in a  
85 comparative way. Therefore, the evolutionary forces at play remain an open question. For  
86 example, while a study in birds suggested that sexual selection (approximated by the intensity of  
87 sexual dimorphism) had driven the evolution of SBGE (17), converse results were found in  
88 cichlid fish (18), in the plant genus *Leucadendron* (19), and in brown algae (20), where genetic  
89 drift was likely to be the strongest evolutionary force driving SBGE. These studies question the  
90 common belief that the extent of sexual dimorphism is correlated to the number of SBGs (8).

91 In flowering plants, dioecy has evolved between 871 and 5,000 times independently (1), thus  
92 providing an exceptional opportunity for comparative analyses. Transitions from  
93 hermaphroditism to dioecy are thought to require an intermediate step, often through monoecy  
94 (female and male flowers on the same plant) or through gynodioecy (separate female and  
95 hermaphrodite individuals) (2, 10, 17–19). The latter assumes the invasion of the hermaphrodite  
96 population by a male-sterile (female) mutant, leading to gynodioecy (reviewed in (2)). Theoretical  
97 work suggests that hermaphrodites in gynodioecious populations gain most of their reproductive  
98 success through their male function (17, 20, 21), the loss of the female function in these  
99 individuals can be selected when it increases male fitness, which can lead to the evolution of  
100 dioecy. The steps to dioecy through the monoecious pathway have received less attention from  
101 modellers so the precise events and the associated selective pressures are less well formalised  
102 (22). To our knowledge, no comparative study has explored the evolution of SBGE in the  
103 monoecy nor the gynodioecy pathway in plants.

104 The *Silene* genus is a model for studying the evolution of plant sexual systems (23, 24). At least  
105 three independent transitions to dioecy have been reported in *Silene* (25–27). It is likely that these  
106 transitions occurred through the gynodioecy pathway, as the genus contains many gynodioecious  
107 species. Dioecy evolved ~11 My ago in the *Melandrium* section, consisting of five dioecious  
108 species (*S. latifolia*, *S. dioica*, *S. heuffelii*, *S. marizii* and *S. diclinis*, (25, 28–30)). Dioecy is  
109 probably younger in section *Otites* (~2.3 My; (27, 31, 32)) and likely of very recent origin in *S.*  
110 *acaulis* ssp *exscapa* (less than 1 My, (26)). XY sex chromosomes share a common origin in the  
111 *Melandrium* section (33). In the *Otites* section, *S. otites* has ZW sex chromosomes, while *S.*  
112 *pseudotites* and *S. colpophylla* have XY sex chromosomes (27, 31). The ZW and XY systems  
113 evolved from different autosomes, although the exact evolutionary history (possibly involving  
114 introgression or turnover) is not known (27). So far, no sex chromosomes have been identified in  
115 *S. acaulis*. If a non-recombining region exists in *S. acaulis*, it is likely to be very small and carry  
116 only a few genes (34).

117 The repeated independent evolution of separate sexes with different ages of dioecy in *Silene*  
118 makes it an interesting model to study SBGE evolution in a comparative framework. So far SBGs  
119 have only been studied in *S. latifolia* (12).

120 In this study, we characterise SBGE in the nine *Silene* dioecious species listed above (from the  
121 three independent transitions to dioecy) and two gynodioecious *Silene* species (*S. vulgaris* and *S.*  
122 *nutans*). We use two hermaphrodite outgroup species (*S. paradoxa* and *S. viscosa*) to compare  
123 SBGE in dioecious and gynodioecious species to homologous hermaphrodite expression. With  
124 this dataset, we aimed to address the following questions: (1) Are there differences in the timing  
125 of the evolution of female- and male-biased genes? (2) Are gene expression changes occurring  
126 mostly in one sex, as previously suggested in *S. latifolia* (12, 35)? (3) Do the same genes  
127 repeatedly become sex-biased in the independent transitions towards dioecy? (4) What  
128 evolutionary forces shape SBGE evolution, drift or selection?

129

130

## 131 **Results**

132

### 133 Transcriptome assemblies and mapping results

134

135 The *S. nutans* and *S. vulgaris* assemblies were composed of 23,836 genes and 31,526 genes,  
136 respectively (see Supplementary Table S1). A BUSCO (version 3.1.0; (64)) analysis showed that  
137 the *S. vulgaris* transcriptome assembly is more complete than that of *S. nutans* (Supplementary  
138 Table S1).

139 We mapped the RNA-seq data of the 9 dioecious species on both transcriptome assemblies and  
140 found that the mapping rate on *S. vulgaris* assembly was more similar among all the species  
141 (50%) than the one on *S. nutans* assembly (Supplementary Table S2). Coupled with the BUSCO  
142 results, we decided to keep the mapping on *S. vulgaris* for the rest of the analyses.

143

### 144 Numbers and proportions of SBGs in dioecious and gynodioecious species

145

146 We used three different tools to identify sex-biased genes: (1) DESeq2, (2) edgeR, (3) Limma-  
147 Voom. These three methods differ slightly in the way they assess sex-biased gene expression due  
148 to differences in the family distribution used for read counts. The two firsts rely on a negative  
149 binomial distribution and the latter on log-normal distribution. To limit biases, the genes with a  
150  $\log(\text{foldchange}) > 2$  and a  $p\text{-value} < 10^{-4}$  in at least 2 of the three methods were considered as sex-  
151 biased. The number of sex-biased genes and the number of sex-biased genes identified as

152 autosomal or sex-linked by SEX-DETECTOR are presented in Supplementary Table S3. Figure 1  
153 represents the proportions of sex-biased genes among expressed genes for the eleven species.  
154 For the rest of the analysis, we will report the genes over-expressed in hermaphrodites of the  
155 gynodioecious species as male-biased, as hermaphrodites of gynodioecious species reproduce  
156 mainly through the male function (21). Also, we checked for methodological biases by repeating  
157 the analyses with different  $p$ -values and fold-change thresholds for sex-biased genes inferences,  
158 and to test for an effect of sample size we repeated all analyses with 4 males and 4 females only  
159 for all species (Supplementary Figure S1 to S5 and Supplementary Tables S4 and S5). We found  
160 qualitatively similar results on these controls.

161

162 As shown in Figure 1, species in section *Melandrium* have the highest proportion of female- and  
163 male-biased genes. This difference is stronger for female-biased genes, with species in section  
164 *Melandrium* having about 4 times more female-biased genes than those in section *Otites*, and ten  
165 times more than gynodioecious species. The proportion of male-biased genes is much lower in  
166 gynodioecious species than in sections *Melandrium* and *Otites*, with *S. acaulis* being somewhat  
167 intermediate. Autosomal and sex-linked genes were identified for the eight dioecious species with  
168 a known pair of sex chromosomes. The pattern of SBG proportions is similar between autosomal  
169 genes and all genes, as expected as most SBGs are autosomal, with male-biased genes being more  
170 numerous than female-biased genes (Figure 1). Strikingly, however, female-biased genes are  
171 overrepresented in sex-linked genes compared to male-biased genes in section *Melandrium*, but  
172 not in section *Otites*.

173

#### 174 SBGs accumulate over time after the evolution of separate sexes

175

176 We used a generalised linear model to investigate the relationship between the number of SBGs  
177 and the age of dioecy (using a negative binomial family, and by accounting for the different  
178 number of expressed genes among species through adding an offset, see Materials and Methods  
179 for details). A significant positive correlation was found between the age of dioecy and the  
180 number of female-biased, male-biased and the total number of SBGs ( $p < 10^{-7}$ ,  $R^2 > 0.9$ ,  
181 Supplementary Table S6, Fig. 2). The number of male-biased genes seemed to reach a plateau as  
182 the age of dioecy increased (Figure 2). We therefore used a polynomial regression for the  
183 relationship between male-biased genes and the age of dioecy (Materials and Methods equation 1,  
184 Supplementary Table S6), which explained more variance compared to a linear model. The same  
185 was true for the relationship between the number of total SBGs and the age of dioecy (Materials  
186 and Methods equation 1, Figure 2, Supplementary Table S6). On the other hand, the number of

187 female-biased genes significantly increased with the age of dioecy without reaching a plateau  
188 (Materials and Methods equation 2, Figure 2, Supplementary Table S6). The positive correlations  
189 between the number of SBGs and the age of dioecy remained significant when accounting for  
190 species phylogeny using generalised least squares (equation 4, Supplementary Table S6).

191 The positive correlations observed between the number of SBGs and the age of dioecy suggest it  
192 takes time for SBGE to evolve, as species with older dioecy have more SBGE. Male-biased genes  
193 evolve early, as they are already present in gynodioecious species, but, after a few My, their  
194 numbers reach a plateau in dioecious species. Female-biased genes evolve later, after the  
195 transition to dioecy. We did not detect a plateau for female-biased gene numbers over time, but  
196 older dioecious species should be studied to address this question.

197

### 198 High turnover of SBGs in *Silene*

199

200 The proportion of species-specific SBGs is larger than that of SBGs shared among several species  
201 (Figure 3). Indeed, there is no species for which the number of specific SBGs is smaller than the  
202 number of SBGs shared with at least another species. This result shows that there is a high  
203 turnover in SBGE evolution in *Silene*. This is consistent with studies in other organisms (65, 66).

204

### 205 Selective pressures on SBGE evolution

206

207 In order to test whether SBGE evolved under positive selection, we calculated the  $\Delta_x$  statistic for  
208 each species and each gene. This statistic summarises the change in expression of a gene in a  
209 focal species with respect to an outgroup species, normalised by the standard deviation in the  
210 focal species (see Materials and Methods). It is based on the double expectation that positive  
211 selection leads to larger than average changes in expression levels between species, as well as  
212 more similar expression levels between individuals within a species (58, 67, 68). We considered  
213 genes with  $\Delta_x$  values higher than the 75 quantile as evolving under positive selection (as in (12);  
214 see below for a more stringent threshold). In order to test for an enrichment of selection in SBGE,  
215 the proportion of SBGs and unbiased genes evolving under selection were compared using a Chi-  
216 square test for each species, sex and type of sex-bias (Figure 4, Supplementary Tables S7 and S8).

217

218 As shown in Figure 4, female-biased expression is due both to increased female expression and  
219 decreased male expression compared to the hermaphrodite outgroup. Similarly, male-biased gene  
220 expression is due both to decreased expression in females and increased expression in males  
221 compared to the hermaphrodite outgroup. In order to assess whether these expression changes in

222 SBGs were driven by selection, we tested for an enrichment in selection in SBGs compared to  
223 unbiased genes (Supplementary Tables S7 and S8). First, in both sections *Melandrium* and *Otites*,  
224 female-biased gene expression that evolved through decreased expression in males compared to  
225 the hermaphrodite outgroup was enriched in positive selection compared to unbiased genes.  
226 Second, for the *Melandrium* section only, increased expression in females for the female-biased  
227 genes is also enriched in positive selection compared to unbiased genes. For male-biased gene  
228 expression, significant enrichment in positive selection was also found among genes for which  
229 expression decreased in females compared to the hermaphrodite outgroup. However, increased  
230 male expression compared to hermaphrodite outgroups was significantly depleted in positive  
231 selection for male-biased genes in eight out of eleven species, suggesting that male expression  
232 evolves mostly under drift or purifying selection in male-biased genes. To differentiate between  
233 drift and purifying selection, we considered expression variation within species (standard  
234 deviation). Male expression was the most variable in male-biased genes, especially when male  
235 expression increased compared to the outgroup (Supplementary Figure S6), suggesting drift was  
236 the driving force for the evolution of expression in this category.

237 Results were qualitatively similar when considering contigs with  $\Delta_x > 10$  as under positive  
238 selection (as done in Scharmann *et al.* 2021 (69)), instead of using the quantile 75 (Supplementary  
239 Table S9). Using a threshold of  $\Delta_x > 10$  is more stringent to infer positive selection because the  
240 species quantile 75 of the  $\Delta_x$  ranged from 2.5 to 4.6. Results were also unaffected when we  
241 repeated the analyses on autosomal genes only (for species without sex chromosomes all genes  
242 were kept, for species with sex chromosomes, only genes inferred as autosomal by SEX-  
243 DETector were kept, Supplementary Table S10). As another control, we ran the same analysis on  
244 leaf tissues (instead of flower buds) in *S. latifolia* only, using *S. viscosa* leaf data as a  
245 hermaphrodite outgroup to compute the  $\Delta_x$ . We detected a significant enrichment in selection for  
246 leaf male-biased genes in *S. latifolia* when male expression increased compared to the outgroup,  
247 as well as when female expression decreased compared to the outgroup (Supplementary Table  
248 S11).

249

250

### 251 Selected feminization of the X chromosome

252

253 We investigated whether the increase in the proportion of female-biased genes among sex-linked  
254 genes in the *Melandrium* section can be attributed to the feminization of the X chromosome.  
255 Feminization of the X is an enrichment of female-beneficial genes on the X, expected to occur  
256 because the X chromosome spends two thirds of its time in females and only one third of its time

257 in males (70, 71). To test for X feminization, we compared the proportion of female-biased genes  
258 on the X that have an expression evolving under positive selection (1) to the proportion of male-  
259 biased genes on the X with an expression evolving under positive selection, and (2) to the  
260 proportion of female-biased genes on the autosomes with an expression evolving under positive  
261 selection. We found that the proportion of female-biased genes evolving under positive selection  
262 was significantly higher on the X compared to the other two categories in the *Melandrium* section  
263 (Chi-square test; see Supplementary Tables S12 and S13). This shows that the X is significantly  
264 enriched in female-biased genes under positive selection in the *Melandrium* section, suggesting  
265 active X feminization. Interestingly, we observed more positive selection signatures for a  
266 reduction of expression in males than for an increase of expression in females. These results tend  
267 to confirm a feminization of the X chromosomes in the *Melandrium* section.  
268 The numbers of female-biased genes in the *Otites* section were too small to conduct such an  
269 analysis.

#### 270 Evolution of SBGs under drift

271

272 We hypothesised that if drift is a strong driver of sex-biased gene expression, species with lower  
273 effective population size may have more SBG. On the contrary, if selection is mostly driving the  
274 evolution of SBGs, species with higher effective population size ( $N_e$ ) should have more SBGs. In  
275 order to test for an effect of the intensity of selection on the number of sex-biased genes, we ran a  
276 generalised linear model between the number of sex-biased genes and the synonymous nucleotide  
277 diversity  $\pi_S$  (a proxy for  $N_e$ , equations 3 and 5). No significant correlation was found in either  
278 direction (Supplementary Figure S7, Supplementary Table S14), suggesting that drift and  
279 selection do not explain differences in SBG numbers among species, or cancel each other.

280 As done by Scharmann *et al.* (2021), we tested whether sex-biased genes had an increased  
281 expression evolutionary rate compared to unbiased genes. To avoid rates being affected by SBGE  
282 evolution, we computed rates of SBGE evolution after removing the species for which the gene is  
283 sex-biased, so that the rates correspond to expression changes before the gene became sex-biased.  
284 We therefore compared expression evolution rates between genes that are always unbiased in all  
285 species and genes that are sex-biased in at least one species, after removing species with sex-  
286 biased expression from the analysis. We found, as Scharmann *et al.* (2021), that genes that are  
287 sex-biased in at least one species have a higher rate of expression change, measured as the mean  
288 of absolute PICs (91.91 on average) compared to genes that are always unbiased (51.93 on  
289 average, one-sided permutation test p-value  $< 2.2 \times 10^{-16}$ , Supplementary Figure S8). Scharmann *et*  
290 *al.* (2021) interpreted this result as an indication that genes that become sex-biased have faster-



291 evolving expression levels, even before becoming sex-biased (69). To further test this  
292 interpretation, we splitted the analysis of PICs for genes that were detected as evolving under  
293 positive selection in at least one species and genes that never evolve under positive selection  
294 (using the previous  $\Delta_x$  analysis). We found that SBGs that evolve under positive selection in at  
295 least one species have the highest rate of expression change, even before becoming sex-biased  
296 (94.96 on average, permutation tests p-values  $< 10^{-3}$ , Supplementary Figure S8). The rate of  
297 expression change was lowest for unbiased genes that never evolve under positive selection  
298 (mean 10.94, permutation tests p-values  $< 10^{-13}$ , Supplementary Figure S9). Therefore both  
299 positive selection and drift seem to accelerate expression evolutionary rates.

300

### 301 Functional analysis of SBGs

302

303 We explored if the SBGs are enriched for functions or pathways linked to sexual reproduction.  
304 We tested the enrichment for four sets of genes (1) the whole set of male- or female-biased genes  
305 (2) the male- or female-biased genes in gynodioecious species (3) the male- or female-biased  
306 genes in dioecious species (4) the male- or female-biased genes under positive selection (using  
307 the previous  $\Delta_x$  analysis, see Supplementary Table S15 for more information). We then looked  
308 for enrichment in functions explicitly linked to sexual selection in each of these sets of genes. We  
309 also produced wordcloud figures to highlight the main functions or pathways (Supplementary  
310 Figure S10 & S11). Only two GO terms are explicitly linked to a reproductive function  
311 (*GO:0090567: reproductive shoot system development* and *GO:0048437: floral organ*  
312 *development*). Those two GO terms are found while testing the whole set of female-biased genes  
313 against the whole annotation.

314

315

316

317

318

## 319 **Discussion**

320

321 We studied Sex-Biased Gene Expression (SBGE) in the flower buds of eleven sexually  
322 dimorphic *Silene* species, including nine dioecious species and two gynodioecious species. The  
323 nine dioecious species originated from three independent transitions to dioecy. The youngest  
324 transition occurred less than one million years ago and the oldest approximately eleven million  
325 years ago (26, 28, 29).

326 Overall, the 11 species displayed more male-biased genes than female-biased genes  
327 (Figure 1), which has already been observed in various plant species before (15). Two possible  
328 explanations for this observation are (i) that drift is stronger in males due to a more variable  
329 reproductive success and a smaller effective population size, or (ii) stronger sexual selection in  
330 males due to strong competition among males. The age of the dioecy is positively correlated with  
331 both the number of male-biased genes and the number of female-biased genes. The dynamics,  
332 however, seem to differ between sexes: male-biased gene numbers increase early and seem to  
333 reach a plateau, whereas female-biased genes evolve more gradually and continuously. A possible  
334 explanation for the plateau reached by the number of male-biased genes is that an equilibrium is  
335 attained among mutations, selection and drift. Mutations create new SBGs in dioecious species  
336 and selection and drift filter them through time.

337 In gynodioecious species, we consider genes with higher expression in the hermaphrodite  
338 individuals as male-biased, since the hermaphrodites' main reproductive output is through the  
339 male function (20). A possible explanation as to why male-biased genes are already present in  
340 gynodioecious species but female-biased genes are nearly absent is that a gene could become  
341 male-biased simply through the reduction of expression in female flowers, as a result of the loss  
342 of the male function. Therefore, although female flowers evolve first in the gynodioecy pathway,  
343 female-biased genes mainly evolve later, when female functions are suppressed in male flowers  
344 (i.e., when full dioecy evolves).

345 The patterns of male- and female-biased genes enrichment are reversed in the non-  
346 recombining region of the sex chromosomes in the Melandrium section (species from the oldest  
347 transition to dioecy, Figure 1). We tested whether the female-biased genes on the X chromosome  
348 bear footprints of positive selection, using the  $\Delta_x$  statistic (see (58)). In brief, if selection drove  
349 the evolution of a SBG, we should observe a strong change in the expression level and a small  
350 variance between individuals of the same sex in a species. The  $\Delta_x$  analysis showed that female-  
351 biased genes in the non-recombining region of the X chromosome are significantly enriched in  
352 positive selection compared to male-biased genes on the non-recombining region of the X  
353 chromosome or female-biased genes on autosomes. This result supports an active feminization of  
354 the X chromosome in the Melandrium section.

355 We used the  $\Delta_x$  statistic to study the selective regime of all the SGBs in the different  
356 species. With the exception of female-biased genes in *S. acaulis* (the species from the most recent  
357 transition to dioecy and very few female-biased genes), the reduction of expression in males for  
358 female-biased genes, or reduction of expression in females for male-biased genes is enriched in  
359 genes with an expression evolving under positive selection for all the dioecious species. In  
360 contrast, the increase of expression is enriched in genes evolving under positive selection only in

361 females of the Melandrium section for the female-biased genes. This suggests that, even if SBGs  
362 result from changes in both sexes, increases in gene expression do generally not occur through  
363 positive selection, while the reduction in expression generally does. For gynodioecious species  
364 and *S. acaulis* (which evolved dioecy recently), the decrease in female expression of male-biased  
365 genes was significantly enriched in selection (Figure 4). These footprints of positive selection  
366 differ from a previous analysis in the *Leucadendron* genus (69), where sex-biased genes were not  
367 enriched in positive selection on expression levels compared to unbiased genes, suggesting that  
368 they mostly evolved under relaxed selection. In order to test whether this difference between the  
369 two studies was due to the sampled tissue (flower buds in *Silene* versus leaves in *Leucadendron*),  
370 we used leaf tissue available in *S. latifolia* and *S. viscosa* to compute the  $\Delta_x$  in *S. latifolia* leaves  
371 (Supplementary Table S11). Leaf male-biased genes are significantly enriched in adaptive  
372 evolution compared to unbiased genes in *S. latifolia*. Therefore, the differences between *Silene*  
373 and *Leucadendron* are not attributable to the sampled tissue.

374 Some SBG categories are significantly enriched in positive selection (Figure 4), but other  
375 categories seem mostly driven by drift as they exhibit a high within-species variation in  
376 expression levels (Supplementary Figure S6). We therefore clearly observe the effects of both  
377 selection and drift on SBGE evolution in *Silene*. This is also visible when studying expression  
378 evolutionary rates (Supplementary Figure S9). In our *Silene* dataset, sex-biased genes that are  
379 never under selection in any species (according to the  $\Delta_x$  analysis) have faster expression  
380 evolutionary rates than unbiased genes that are never under selection, suggesting that SBGE leads  
381 to faster expression evolutionary rates because of drift. Expression evolutionary rates are even  
382 further accelerated by selection, because SBGs that evolve under selection (according to the  $\Delta_x$   
383 analysis) in at least one species have higher expression evolutionary rates than SBGs that never  
384 evolve under selection (Supplementary Figure S9). We therefore confirm the theoretical  
385 prediction by Dapper and Wade (72) that SBGs mainly evolve under relaxed selection, with some  
386 exceptions. For some SBGs, positive selection is especially strong and contributes to accelerated  
387 rates of expression evolution in *Silene*.

388 To our knowledge, this analysis is the first comparative analysis of SBGE between  
389 gynodioecious species and dioecious species from independent transitions to dioecy. Indeed,  
390 despite numerous analyses of SBGE conducted to date, very few have been done in a comparative  
391 way (but see (65, 66, 69, 73)). This limits our understanding of its evolution and the evolutionary  
392 forces that shape it, especially in a transition from hermaphroditism to dioecy or gonochorism.  
393 Here, we show that the proportion of sex-biased genes correlates with the age of dioecy and that,  
394 through the gynodioecious pathway, male-biased genes emerge first. Also, our results support a  
395 combined action of positive selection and genetic drift in the evolution of SBGE. This nuances

396 the theoretical prediction that most sex-biased genes should evolve under relaxed selection,  
397 simply because sex-specific expression reduces selection coefficient of a gene (72). Our study  
398 therefore calls for more investigation in other groups to enlighten why in some species SBGE  
399 seems to evolve mostly under drift (like *Leucadendron*), while other species show positive  
400 selection driving SBGE (such as *Silene*).

401

## 402 **Materials and Methods**

403

### 404 Data

405

406 - Crossing and sequencing for the *Melandrium* section

407

408 For *S. latifolia* and *S. vulgaris*, data have been reused from Zemp *et al.*, (2016) and Zemp *et al.*  
409 (2018)(12,37)). For *S. dioica*, *S. heuffelii*, *S. marizii* and *S. diclinis*, we have crossed a female and  
410 a male from two different populations. Seeds from the crosses were sown to produce F1  
411 individuals. Three flower buds (~2-3 mm) without the calyx were sampled for multiple females  
412 and males and their parents (see Supplementary Table S16 for details on sample sizes). High  
413 quality RNA (RIN > 9) has been extracted using the Plant Total RNA Mini Kit from Geneaid.  
414 RNAseq libraries were prepared using Ultra II RNA Library Prep Kit for Illumina from  
415 NEBNext. The libraries were then sequenced on a HiSeq4000 instrument using the paired end  
416 150bp protocol at the Functional Genomic Center, Zurich.

417

418 - Sampling and sequencing of *S. acaulis*

419

420 Flower buds from males and females of *Silene acaulis* have been sampled from a natural  
421 population, in 2018, at “Rocher Blanc” (“massif d’Allevard”, France, between 2800m and 2900m  
422 above sea level).

423 The RNA preparation was done by the AGAP institute (Montpellier, France). For all individuals,  
424 fresh tissues were sent, then flash-frozen (Freshfreeze method). RNA was extracted following the  
425 SIGMA protocol and sequenced using the HiSeq3000-HWI-J00115 technology, producing 150bp  
426 paired reads.

427

428 - Published dataset for *Otites* section

429

430 For *S. otites* and *S. pseudotites*, we used publicly available data from Martin *et al.* (2019) (31).

431 For *S. colpophylla*, we used data from Balounova *et al.* (2019)(27).

432

433 - Published dataset for hermaphrodite species, gynodioecious species, and *Dianthus*  
434 *chinensis*

435

436 For *S. nutans*, *S. paradoxa* and *S. viscosa* (the two hermaphrodite outgroups), as well as *Dianthus*  
437 *chinensis* we used publicly available RNAseq data from Muyle *et al.* (2021)(36) .

438

#### 439 Transcriptome assemblies

440

441 We assembled a *de novo* transcriptome for both gynodioecious species: *S. vulgaris* and *S. nutans*.

442 To this end, we used the tool DRAP (version 1.92,(37)), which allows merging and compacting  
443 several transcriptome assemblies into a single “meta-assembly”.

444 For *S. vulgaris*, we first independently assembled two transcriptomes from two hermaphrodite  
445 individuals and one transcriptome from a female (tool RunDrap from Drap – default parameters).  
446 Then, we merged these three transcriptomes into a single one with RunMeta (from DRAP, default  
447 parameters).

448 For *S. nutans*, we independently assembled two hermaphrodite transcriptomes and two female  
449 transcriptomes that we merged in a single one (using the default parameters for RunDrap and  
450 RunMeta, as we did for *S. vulgaris*).

451 DRAP provides several assemblies. We used the one filtered with TransDecoder  
452 (<https://github.com/TransDecoder/TransDecoder>) in order to obtain the Open Reading Frame  
453 (ORF) of every gene.

454

#### 455 Trimming, filtering and mapping of reads

456

457 We filtered PCR duplicates with Condetri filterPCRdupl(38). The reads with a Phred quality  
458 score lower than 64 were filtered with trimmomatic (option PE -phred64)(version 0.39; Bolger,  
459 Lohse, and Usadel 2014) and the adapters were removed using prinseq-lite (options -trim\_tail\_left  
460 5 -trim\_tail\_left 5)(version 0.20.4; (39)). Once filtered, the reads were mapped on both  
461 transcriptome assemblies using GSNAP (option m 0.1)(version 2019-09-12 ;(40)). In order to  
462 increase the amount of reads mapped for distant species, we re-ran GSNAP with the SNP-tolerant  
463 option and SNPs identified in the first mapping (method previously employed in Prentout *et al.*  
464 (2020)(14)). This iteration has been done once for each species, except when mapping *S. vulgaris*  
465 and *S. nutans* on their respective transcriptome. Samtools version 1.9 (41) was used to remove  
466 unmapped reads and sort the mapping outputs to bam files (view -F 4 | sort).

467

## 468 Transcriptome annotation

469

470 We annotated the transcriptome of *S. vulgaris* as it is the one that we used for the rest of the  
471 analysis (see results section). We used diamond to blast the nucleotide CDS, provided by DRAP,  
472 against the nr database (nr version of April 2022)(diamond v2.0.4.142, blastx -p 4 --max-hsps 3 -e  
473 1e-5 -f 5)(42). The diamond output (xml format) was provided to Blast2GO for the gene ontology  
474 mapping (Blast2GO Basic v6.0)(43, 44).

475 To statistically test if a set of genes is enriched for specific functional pathways, we used two  
476 tools: GOstats (version 2.62.0, (45)) and clusterprofiler (version 3.15.0, (46)), and kept the GO  
477 term with an adjusted  $p$ -value  $< 0.05$ .

478

## 479 Sex-linked genes identification

480

481 Sex-linked genes are genes located in the non-recombining region of the Y (or W) chromosome  
482 or the homologous region on the X (or the Z) chromosome. In order to identify sex-linked genes  
483 in dioecious species, we first inferred the genotype of each individual with Reads2snp version 2.0  
484 (47). We accounted for allelic expression bias, without filtering for paralogous SNPs and retained  
485 positions with a minimum coverage of 3 (-aeb -par 0 -min 3).

486 SEX-DETECTOR (48), a tool based on the analyses of allele segregation within a cross, was used to  
487 identify sex-linked transcripts in every dioecious species of the Otites and Melandrium sections.  
488 This tool is based on an SEM algorithm and computes, for each gene, a posterior probability of  
489 being autosomal ( $P_A$ ), XY ( $P_{XY}$ ) or X-hemizygous ( $P_{X-hemi}$ ). We considered a gene as sex-linked  
490 (or autosomal) if  $P_{XY} + P_{X-hemi} > 0.8$  (respectively  $P_A > 0.8$ ), and if at least one SNP was classified  
491 as sex-linked (or autosomal) without genotyping error.

492 Three models have been implemented in SEX-DETECTOR: (1) XY sex chromosome system, (2)  
493 ZW sex chromosome system, (3) a system without sex chromosomes.

494 In all species, the type of sex chromosome has already been identify, so we run SEX-DETECTOR  
495 with the corresponding model (i.e. ZW for *S. otites* and XY for the seven other species; (27, 28,  
496 31)).

497 As mentioned in the introduction, no sex chromosomes have been identified in *S. acaulis* so far  
498 (34). Because their detection is beyond the scope of this analysis, we didn't detect sex-linked  
499 genes in this species.

500

## 501 Gene expression level and sex-biased gene identification

502

503 The expression level of each gene was computed with samtools idxstats (Version 1.9; (41)). Then,  
504 three tools were used to classify a gene as sex-biased: EdgeR (Version 3.36.0; (49)), DESeq2  
505 (Version 1.34.0; (50)) and Limma-Voom (Version 3.50.3; (51)). We classified a gene as sex-  
506 biased if at least two of the three methods classified it as sex-biased with  $p$ -value lower than  $10^{-4}$   
507 and greater than 2 ( $\log_2FC > 1$ ).

508 To infer in which sex the expression changed compared to the ancestral expression level before  
509 separate sexes evolution, we computed the mean fragment per kilobase of transcript per million  
510 mapped reads (FPKM) for each gene in every individual, and then, the mean FPKM for each gene  
511 in each sex (males, females or hermaphrodites). The difference in mean expression between the  
512 focal dioecious (or gynodioecious) species and the closest fully hermaphrodite species (either *S.*  
513 *paradoxa* or *S. viscosa*) was used to infer an increase or a decrease in gene expression compared  
514 to ancestral expression before separate sexes evolution. For *S. diclinis*, *S. dioica*, *S. heuffelii*, *S.*  
515 *latifolia*, *S. marizii* and *S. vulgaris*, we used the hermaphrodite species *S. viscosa* as an outgroup.  
516 For *S. acaulis*, *S. colpophylla*, *S. nutans*, *S. otites* and *S. pseudotites*, we used the hermaphrodite  
517 species *S. paradoxa* as an outgroup.

518

### 519 Phylogenetic reconstruction

520

521 *Dianthus chinensis* was used as the outgroup species for the phylogenetic reconstruction (we used  
522 2 hermaphrodite individuals). In order to build the species tree, we kept transcripts of autosomal  
523 genes for which the sequence was available in all individuals of all species ( $N_{\text{individuals}} = 143$ ) with a  
524 maximum of 30% of Ns in the sequence (740 genes in total). In each individual, only one of the  
525 two alleles of each gene was kept for phylogenetic reconstruction. We concatenated the sequences  
526 of the 740 genes in each of the 143 individuals, which led to a sequence of 873,747 bp per  
527 individual. The phylogeny was inferred with IQ-TREE2 (version 2.1.3; (52)) using the GTR+G4  
528 model and 100 replicates for the bootstraps.

529

### 530 Linear regressions between the number of sex-biased genes and the age of dioecy

531

532 The number of sex biased genes was correlated to the age of dioecy using a generalised linear  
533 model with negative binomial 1 family (appropriate for large count data) implemented in the  
534 glmmTMB R package (53). In order to account for the different number of sampled genes among  
535 species, the total number of expressed genes was log transformed and used as an offset. For the  
536 total number of sex-biased genes and the number of male-biased genes, the model that explained

537 the most variance was a raw polynomial of degree 2 (equation 1). For female-biased genes, a  
538 simpler model without polynomial effects was used (equation 2). Fit of the model to the data was  
539 checked using the DHARMA R package by looking at residual plots (54).

540

541 Number of sex-biased genes  $\sim$  poly(Age dioecy, 2, raw=T) + offset(log(Total\_expressed+1))  
542 (equation 1)

543

544 Number of sex-biased genes  $\sim$  Age dioecy + offset(log(Total\_expressed+1)) (equation 2)

545

546 The regression output was plotted using the R package ggeffects to compute predicted values of  
547 the model with function ggpredict (55). The  $R^2$  was computed using the function r.squaredGLMM  
548 of the R package MuMIn (56).

549

550 A similar model was run to test for an effect of the effective population size  $N_e$  (the synonymous  
551 nucleotide diversity  $\pi_S$  was used as a proxy for  $N_e$ ). The negative binomial distribution was used  
552 and an offset was included:

553

554 Number of sex-biased genes  $\sim$  scale( $\pi_S$ ) + offset(log(Total\_expressed+1)) (equation 3)

555

556 We also ran models that corrected for phylogenetic relationships among species using generalized  
557 least squares implemented in the nlme R package (57), using function gls and Martin's  
558 correlation structure. Since an offset cannot be implemented in such models, we did not include it.  
559 As the negative binomial family is not available in gls, we log transformed the number of sex-  
560 biased genes:

561

562 log(Number of sex-biased genes + 1)  $\sim$  scale(Age dioecy) + corMartins(phylogeny) (equation 4)

563

564 log(Number of sex-biased genes + 1)  $\sim$  scale( $\pi_S$ ) + corMartins(phylogeny) (equation 5)

565

## 566 $\Delta_x$ analysis

567

568 The  $\Delta_x$  has become a widely used statistic in transcriptomics to evaluate selection pressures on  
569 gene expression (58). In order to compute the  $\Delta_x$  for each sex, gene and species, the expression  
570 level of each gene and individual was first determined. The number of mapped reads was  
571 computed for each gene and individual using samtools version 1.10 idxstats and was normalised



572 to reads per kilobase per million mapped reads (RPKM) for each contig and individual separately  
573 as follows:

574

$$\text{gene RPKM} = \frac{\text{raw number of mapped reads on gene}}{(\text{contig length} \times \text{individual mapped library size})} \times 10^9 \quad (\text{equation 6})$$

578

579 Then, the  $\Delta_x$  was computed for each species and sex separately (i.e. for males and females  
580 separately) as follows:

581

$$\Delta_x = \frac{\text{abs}(\text{mean}(\text{focal species expression}) - \text{mean}(\text{outgroup}))}{\text{standard deviation}(\text{focal species expression})} \quad (\text{equation 7})$$

584

585 Where abs stands for absolute value. The hermaphrodite species used as the outgroup are the  
586 same as in the “Gene expression level and sex-biased gene identification” section.

587 For each species, contigs with  $\Delta_x$  values higher than the 75 quantile of  $\Delta_x$  values were considered  
588 as under positive selection for expression evolution (as in (12)). We compared the proportion of  
589 SBGs and unbiased genes under selection using a Chi-square test and corrected for multiple tests  
590 using Benjamini & Hochberg correction (59).

591 Genes with sex-specific expression were excluded from  $\Delta_x$  analyses, to avoid the confounding  
592 effect of including genes that are encoding tissues or functions sex-specific (i.e. androecium,  
593 gynoecium, etc), without the need to involve selection.

594 We also run this analysis on leaf tissues from *S. latifolia* and *S. viscosa*, to test if different tissues  
595 show different results.

596

### 597 Phylogenetically independent contrasts (PICs)

598

599 Phylogenetic independent contrasts (PICs) correspond to the amount of change (here change in  
600 expression level) between two taxa divided by the branch length separating them. The mean of  
601 the absolute standardised PICs (60) per gene was employed as a measure of the rate of expression  
602 evolution (61). For each gene, PICs were calculated based on the species tree and the mean  
603 RPKM expression values per species, using the pic function in APE (62). Species exhibiting sex-  
604 biased expressions were excluded when calculating PICs, so that the PICs only measure gene  
605 expression variation without sex bias (i.e. before the gene became sex-biased). Genes that are sex-  
606 biased in at least one species and genes that are always unbiased were then compared for their

607 mean absolute PICs on the basis of 10,000 permutations, using the function permTS in the R  
608 package perm v1.0 (63).

609

610

611

612

## 613 **References**

614

- 615 1. S. S. Renner, The relative and absolute frequencies of angiosperm sexual systems: dioecy,  
616 monoecy, gynodioecy, and an updated online database. *Am. J. Bot.* **101**, 1588–1596 (2014).
- 617 2. C. Fruchard, G. A. B. Marais, "The Evolution of Sex Determination in Plants" in *Evolutionary*  
618 *Developmental Biology: A Reference Guide*, L. Nuño de la Rosa, G. B. Müller, Eds.  
619 (Springer International Publishing, Cham, 2021), pp. 683–696.
- 620 3. P. Jarne, J. R. Auld, ANIMALS MIX IT UP TOO: THE DISTRIBUTION OF SELF-  
621 FERTILIZATION AMONG HERMAPHRODITIC ANIMALS. *Evolution* . **60**, 1816–1824  
622 (2006).
- 623 4. T. E. Dawson, M. A. Geber, "Sexual Dimorphism in Physiology and Morphology" in *Gender*  
624 *and Sexual Dimorphism in Flowering Plants*, M. A. Geber, T. E. Dawson, L. F. Delph, Eds.  
625 (Springer Berlin Heidelberg, Berlin, Heidelberg, 1999), pp. 175–215.
- 626 5. S. C. H. Barrett, J. Hough, Sexual dimorphism in flowering plants. *J. Exp. Bot.* **64**, 67–82  
627 (2013).
- 628 6. E. Mori, G. Mazza, S. Lovari, "Sexual Dimorphism" in *Encyclopedia of Animal Cognition and*  
629 *Behavior*, J. Vonk, T. Shackelford, Eds. (Springer International Publishing, Cham, 2017), pp.  
630 1–7.
- 631 7. S. Naqvi, A. K. Godfrey, J. F. Hughes, M. L. Goodheart, R. N. Mitchell, D. C. Page,  
632 Conservation, acquisition, and functional impact of sex-biased gene expression in  
633 mammals. *Science*. **365** (2019), doi:10.1126/science.aaw7317.
- 634 8. S. Grath, J. Parsch, Sex-Biased Gene Expression. *Annu. Rev. Genet.* **50**, 29–44 (2016).
- 635 9. D. Bachtrog, J. E. Mank, C. L. Peichel, M. Kirkpatrick, S. P. Otto, T.-L. Ashman, M. W.  
636 Hahn, J. Kitano, I. Mayrose, R. Ming, N. Perrin, L. Ross, N. Valenzuela, J. C. Vamossi, Tree  
637 of Sex Consortium, Sex determination: why so many ways of doing it? *PLoS Biol.* **12**,  
638 e1001899 (2014).
- 639 10. S. S. Renner, N. A. Müller, Plant sex chromosomes defy evolutionary models of expanding  
640 recombination suppression and genetic degeneration. *Nat Plants*. **7**, 392–402 (2021).
- 641 11. A. Harkess, F. Mercati, H.-Y. Shan, F. Sunseri, A. Falavigna, J. Leebens-Mack, Sex-biased  
642 gene expression in dioecious garden asparagus (*Asparagus officinalis*). *New Phytol.* **207**,  
643 883–892 (2015).
- 644 12. N. Zemp, R. Tavares, A. Muyle, D. Charlesworth, G. A. B. Marais, A. Widmer, Evolution of  
645 sex-biased gene expression in a dioecious plant. *Nat Plants*. **2**, 16168 (2016).
- 646 13. P. Veltsos, Y. Fang, A. R. Cossins, R. R. Snook, M. G. Ritchie, Mating system manipulation  
647 and the evolution of sex-biased gene expression in *Drosophila*. *Nat. Commun.* **8**, 2072  
648 (2017).

- 649 14. D. Prentout, O. Razumova, B. Rhoné, H. Badouin, H. Henri, C. Feng, J. Käfer, G. Karlov, G.  
650 A. B. Marais, An efficient RNA-seq-based segregation analysis identifies the sex  
651 chromosomes of *Cannabis sativa*. *Genome Res.* **30**, 164–172 (2020).
- 652 15. A. Muyle, How different is the evolution of sex-biased gene expression between plants and  
653 animals? A commentary on: “Sexual dimorphism and rapid turnover in gene expression in  
654 pre-reproductive seedlings of a dioecious herb.” *Ann. Bot.* **123** (2019), pp. iv–v.
- 655 16. B. T. Mayne, T. Bianco-Miotto, S. Buckberry, J. Breen, V. Clifton, C. Shoubridge, C. T.  
656 Roberts, Large Scale Gene Expression Meta-Analysis Reveals Tissue-Specific, Sex-Biased  
657 Gene Expression in Humans. *Front. Genet.* **7**, 183 (2016).
- 658 17. B. Charlesworth, D. Charlesworth, A Model for the Evolution of Dioecy and Gynodioecy.  
659 *Am. Nat.* **112**, 975–997 (1978).
- 660 18. E. M. Golenberg, N. W. West, Hormonal interactions and gene regulation can link monoecy  
661 and environmental plasticity to the evolution of dioecy in plants. *Am. J. Bot.* **100**, 1022–1037  
662 (2013).
- 663 19. S. C. H. Barrett, The evolution of plant sexual diversity. *Nat. Rev. Genet.* **3**, 274–284 (2002).
- 664 20. D. G. Lloyd, Parental strategies of angiosperms. *N. Z. J. Bot.* **17**, 595–606 (1979).
- 665 21. D. G. Lloyd, The transmission of genes via pollen and ovules in gynodioecious angiosperms.  
666 *Theor. Popul. Biol.* **9**, 299–316 (1976).
- 667 22. J. Käfer, G. A. B. Marais, J. R. Pannell, On the rarity of dioecy in flowering plants. *Mol. Ecol.*  
668 **26**, 1225–1241 (2017).
- 669 23. G. Bernasconi, J. Antonovics, A. Biere, D. Charlesworth, L. F. Delph, D. Filatov, T. Giraud,  
670 M. E. Hood, G. A. B. Marais, D. McCauley, J. R. Pannell, J. A. Shykoff, B. Vyskot, L. M.  
671 Wolfe, A. Widmer, *Silene* as a model system in ecology and evolution. *Heredity* . **103**, 5–14  
672 (2009).
- 673 24. I. Casimiro-Soriguer, M. L. Buide, E. Narbona, Diversity of sexual systems within different  
674 lineages of the genus *Silene*. *AoB Plants*. **7** (2015), doi:10.1093/aobpla/plv037.
- 675 25. C. Desfeux, B. Lejeune, Systematics of Euromediterranean *Silene* (Caryophyllaceae):  
676 evidence from a phylogenetic analysis using ITS sequences. *C. R. Acad. Sci. III.* **319**, 351–  
677 358 (1996).
- 678 26. G. Gussarova, G. A. Allen, Y. Mikhaylova, L. J. McCormick, V. Mirré, K. L. Marr, R. J.  
679 Hebda, C. Brochmann, Vicariance, long-distance dispersal, and regional extinction-  
680 recolonization dynamics explain the disjunct circumpolar distribution of the arctic-alpine plant  
681 *Silene acaulis*. *Am. J. Bot.* **102**, 1703–1720 (2015).
- 682 27. V. Balounova, R. Gogela, R. Cegan, P. Cangren, J. Zluvova, J. Safar, V. Kovacova, R.  
683 Bergero, R. Hobza, B. Vyskot, B. Oxelman, D. Charlesworth, B. Janousek, Evolution of sex  
684 determination and heterogamety changes in section *Otites* of the genus *Silene*. *Sci. Rep.* **9**,  
685 1045 (2019).
- 686 28. G. A. B. Marais, A. Forrest, E. Kamau, J. Käfer, V. Daubin, D. Charlesworth, Multiple nuclear  
687 gene phylogenetic analysis of the evolution of dioecy and sex chromosomes in the genus  
688 *Silene*. *PLoS One*. **6**, e21915 (2011).
- 689 29. M. Krasovec, M. Chester, K. Ridout, D. A. Filatov, The Mutation Rate and the Age of the Sex  
690 Chromosomes in *Silene latifolia*. *Curr. Biol.* **28**, 1832–1838.e4 (2018).
- 691 30. A. Rautenberg, L. Hathaway, B. Oxelman, H. C. Prentice, Geographic and phylogenetic

- 692 patterns in *Silene* section *Melandrium* (Caryophyllaceae) as inferred from chloroplast and  
693 nuclear DNA sequences. *Mol. Phylogenet. Evol.* **57**, 978–991 (2010).
- 694 31. H. Martin, F. Carpentier, S. Gallina, C. Godé, E. Schmitt, A. Muyle, G. A. B. Marais, P.  
695 Touzet, Evolution of Young Sex Chromosomes in Two Dioecious Sister Plant Species with  
696 Distinct Sex Determination Systems. *Genome Biol. Evol.* **11**, 350–361 (2019).
- 697 32. V. Slancarova, J. Zdanska, B. Janousek, M. Talianova, C. Zschach, J. Zluvova, J. Siroky, V.  
698 Kovacova, H. Blavet, J. Danihelka, B. Oxelman, A. Widmer, B. Vyskot, Evolution of sex  
699 determination systems with heterogametic males and females in *silene*. *Evolution.* **67**,  
700 3669–3677 (2013).
- 701 33. R. Ming, A. Bendahmane, S. S. Renner, Sex chromosomes in land plants. *Annu. Rev. Plant*  
702 *Biol.* **62**, 485–514 (2011).
- 703 34. D. Prentout, thesis, Université de Lyon (2021).
- 704 35. N. Zemp, A. Widmer, D. Charlesworth, Has adaptation occurred in males and females since  
705 separate sexes evolved in the plant *Silene latifolia*? *Proc. Biol. Sci.* **285** (2018),  
706 doi:10.1098/rspb.2017.2824.
- 707 36. A. Muyle, H. Martin, N. Zemp, M. Mollion, S. Gallina, R. Tavares, A. Silva, T. Bataillon, A.  
708 Widmer, S. Glémin, P. Touzet, G. A. B. Marais, Dioecy Is Associated with High Genetic  
709 Diversity and Adaptation Rates in the Plant Genus *Silene*. *Mol. Biol. Evol.* **38**, 805–818  
710 (2021).
- 711 37. C. Cabau, F. Escudié, A. Djari, Y. Guiguen, J. Bobe, C. Klopp, Compacting and correcting  
712 Trinity and Oases RNA-Seq de novo assemblies. *PeerJ.* **5**, e2988 (2017).
- 713 38. L. Smeds, A. Künstner, ConDeTri--a content dependent read trimmer for Illumina data.  
714 *PLoS One.* **6**, e26314 (2011).
- 715 39. R. Schmieder, R. Edwards, Quality control and preprocessing of metagenomic datasets.  
716 *Bioinformatics.* **27**, 863–864 (2011).
- 717 40. T. D. Wu, J. Reeder, M. Lawrence, G. Becker, M. J. Brauer, "GMAP and GSNAP for  
718 Genomic Sequence Alignment: Enhancements to Speed, Accuracy, and Functionality" in  
719 *Statistical Genomics: Methods and Protocols*, E. Mathé, S. Davis, Eds. (Springer New York,  
720 New York, NY, 2016), pp. 283–334.
- 721 41. H. Li, B. Handsaker, A. Wysoker, T. Fennell, J. Ruan, N. Homer, G. Marth, G. Abecasis, R.  
722 Durbin, 1000 Genome Project Data Processing Subgroup, The Sequence Alignment/Map  
723 format and SAMtools. *Bioinformatics.* **25**, 2078–2079 (2009).
- 724 42. B. Buchfink, K. Reuter, H.-G. Drost, Sensitive protein alignments at tree-of-life scale using  
725 DIAMOND. *Nat. Methods.* **18**, 366–368 (2021).
- 726 43. A. Conesa, S. Götz, J. M. García-Gómez, J. Terol, M. Talón, M. Robles, Blast2GO: a  
727 universal tool for annotation, visualization and analysis in functional genomics research.  
728 *Bioinformatics.* **21**, 3674–3676 (2005).
- 729 44. S. Götz, J. M. García-Gómez, J. Terol, T. D. Williams, S. H. Nagaraj, M. J. Nueda, M.  
730 Robles, M. Talón, J. Dopazo, A. Conesa, High-throughput functional annotation and data  
731 mining with the Blast2GO suite. *Nucleic Acids Res.* **36**, 3420–3435 (2008).
- 732 45. S. Falcon, R. Gentleman, Using GOSTats to test gene lists for GO term association.  
733 *Bioinformatics.* **23**, 257–258 (2007).
- 734 46. T. Wu, E. Hu, S. Xu, M. Chen, P. Guo, Z. Dai, T. Feng, L. Zhou, W. Tang, L. Zhan, X. Fu, S.

- 735 Liu, X. Bo, G. Yu, clusterProfiler 4.0: A universal enrichment tool for interpreting omics data.  
736 *Innovation (Camb)*. **2**, 100141 (2021).
- 737 47. P. Gayral, J. Melo-Ferreira, S. Glémin, N. Bierne, M. Carneiro, B. Nabholz, J. M. Lourenco,  
738 P. C. Alves, M. Ballenghien, N. Faivre, K. Belkhir, V. Cahais, E. Loire, A. Bernard, N. Galtier,  
739 Reference-free population genomics from next-generation transcriptome data and the  
740 vertebrate-invertebrate gap. *PLoS Genet*. **9**, e1003457 (2013).
- 741 48. A. Muyle, J. Käfer, N. Zemp, S. Mousset, F. Picard, G. A. Marais, SEX-DETECTOR: A  
742 Probabilistic Approach to Study Sex Chromosomes in Non-Model Organisms. *Genome Biol.*  
743 *Evol*. **8**, 2530–2543 (2016).
- 744 49. M. D. Robinson, D. J. McCarthy, G. K. Smyth, edgeR: a Bioconductor package for  
745 differential expression analysis of digital gene expression data. *Bioinformatics*. **26**, 139–140  
746 (2010).
- 747 50. M. I. Love, W. Huber, S. Anders, Moderated estimation of fold change and dispersion for  
748 RNA-seq data with DESeq2. *Genome Biol*. **15**, 550 (2014).
- 749 51. M. E. Ritchie, B. Phipson, D. Wu, Y. Hu, C. W. Law, W. Shi, G. K. Smyth, limma powers  
750 differential expression analyses for RNA-sequencing and microarray studies. *Nucleic Acids*  
751 *Res*. **43**, e47 (2015).
- 752 52. B. Q. Minh, H. A. Schmidt, O. Chernomor, D. Schrempf, M. D. Woodhams, A. von Haeseler,  
753 R. Lanfear, IQ-TREE 2: New Models and Efficient Methods for Phylogenetic Inference in the  
754 Genomic Era. *Mol. Biol. Evol*. **37**, 1530–1534 (2020).
- 755 53. M. E. Brooks, K. Kristensen, K. J. van Benthem, A. Magnusson, C. W. Berg, A. Nielsen, H.  
756 J. Skaug, M. Machler, B. M. Bolker, glmmTMB balances speed and flexibility among  
757 packages for zero-inflated generalized linear mixed modeling. *R J*. **9**, 378–400 (2017).
- 758 54. F. Hartig, DHARMA: residual diagnostics for hierarchical (multi-level/mixed) regression  
759 models. R package version 0.3. 3.0 (2020).
- 760 55. D. Lüdtke, Ggeffects: Tidy data frames of marginal effects from regression models. *J.*  
761 *Open Source Softw*. **3**, 772 (2018).
- 762 56. K. Barton, MuMIn : multi-model inference. R package version 1. 0. 0. [http://r-forge.r-](http://r-forge.r-project.org/projects/mumin/)  
763 [project.org/projects/mumin/](http://r-forge.r-project.org/projects/mumin/) (2009) (available at  
764 <https://cir.nii.ac.jp/crid/1573387450573265536>).
- 765 57. J. Pinheiro, D. Bates, S. DebRoy, D. Sarkar, R. C. Team, Others, Nlme: linear and nonlinear  
766 mixed effects models. R package version 3.1-162 (2023).
- 767 58. P. D. Price, D. H. Palmer Drogue, J. A. Taylor, D. W. Kim, E. S. Place, T. F. Rogers, J. E.  
768 Mank, C. R. Cooney, A. E. Wright, Detecting signatures of selection on gene expression.  
769 *Nat Ecol Evol*. **6**, 1035–1045 (2022).
- 770 59. Y. Benjamini, Y. Hochberg, Controlling the false discovery rate: A practical and powerful  
771 approach to multiple testing. *J. R. Stat. Soc*. **57**, 289–300 (1995).
- 772 60. J. Felsenstein, Phylogenies and the Comparative Method. *Am. Nat*. **125**, 1–15 (1985).
- 773 61. T. Garland Jr, Rate tests for phenotypic evolution using phylogenetically independent  
774 contrasts. *Am. Nat*. **140**, 509–519 (1992).
- 775 62. E. Paradis, K. Schliep, ape 5.0: an environment for modern phylogenetics and evolutionary  
776 analyses in R. *Bioinformatics*. **35**, 526–528 (2019).

- 777 63. M. P. Fay, P. A. Shaw, Exact and Asymptotic Weighted Logrank Tests for Interval Censored  
778 Data: The interval R package. *J. Stat. Softw.* **36** (2010), doi:10.18637/jss.v036.i02.
- 779 64. F. A. Simão, R. M. Waterhouse, P. Ioannidis, E. V. Kriventseva, E. M. Zdobnov, BUSCO:  
780 assessing genome assembly and annotation completeness with single-copy orthologs.  
781 *Bioinformatics.* **31**, 3210–3212 (2015).
- 782 65. G. G. Cossard, O. Godfroy, Z. Nehr, C. Cruaud, J. M. Cock, A. P. Lipinska, S. M. Coelho,  
783 Selection drives convergent gene expression changes during transitions to co-sexuality in  
784 haploid sexual systems. *Nat Ecol Evol.* **6**, 579–589 (2022).
- 785 66. N. Lichilín, A. El Taher, A. Böhne, Sex-biased gene expression and recent sex chromosome  
786 turnover. *Philos. Trans. R. Soc. Lond. B Biol. Sci.* **376**, 20200107 (2021).
- 787 67. S. A. Rifkin, J. Kim, K. P. White, Evolution of gene expression in the *Drosophila*  
788 *melanogaster* subgroup. *Nat. Genet.* **33**, 138–144 (2003).
- 789 68. P. Khaitovich, G. Weiss, M. Lachmann, I. Hellmann, W. Enard, B. Muetzel, U. Wirkner, W.  
790 Ansorge, S. Pääbo, A neutral model of transcriptome evolution. *PLoS Biol.* **2**, E132 (2004).
- 791 69. M. Scharmann, A. G. Rebelo, J. R. Pannell, High rates of evolution preceded shifts to sex-  
792 biased gene expression in *Leucadendron*, the most sexually dimorphic angiosperms. *Elife.*  
793 **10** (2021), doi:10.7554/eLife.67485.
- 794 70. W. R. Rice, SEX CHROMOSOMES AND THE EVOLUTION OF SEXUAL DIMORPHISM.  
795 *Evolution.* **38**, 735–742 (1984).
- 796 71. D. Bachtrog, A dynamic view of sex chromosome evolution. *Curr. Opin. Genet. Dev.* **16**,  
797 578–585 (2006).
- 798 72. A. L. Dapper, M. J. Wade, Relaxed Selection and the Rapid Evolution of Reproductive  
799 Genes. *Trends Genet.* **36**, 640–649 (2020).
- 800 73. P. W. Harrison, A. E. Wright, F. Zimmer, R. Dean, S. H. Montgomery, M. A. Pointer, J. E.  
801 Mank, Sexual selection drives evolution and rapid turnover of male gene expression. *Proc.*  
802 *Natl. Acad. Sci. U. S. A.* **112**, 4393–4398 (2015).

803  
804  
805  
806  
807  
808  
809  
810  
811  
812  
813  
814  
815  
816  
817  
818  
819  
820  
821  
822  
823

824  
825  
826  
827  
828  
829  
830  
831  
832  
833  
834  
835  
836  
837  
838  
839  
840  
841  
842  
843  
844  
845  
846  
847  
848  
849  
850  
851  
852  
853  
854  
855  
856  
857  
858  
859  
860  
861  
862  
863  
864  
865  
866  
867  
868

## Acknowledgments

We would like to thank Theo Tricou for his advice with the phylogenetic reconstruction. This work was performed using the computing facilities of the CC LBBE/PRABI and of the Institut Français de Bioinformatique.

**Funding:** This project was supported through ANR grant ANR-14-CE19-0021-01 to G.A.B.M.

### Author contributions:

Conceptualization: GABM, AW

Funding acquisition: GABM, AW

Project administration: GABM, AW

Software: DP, AM, BB

Formal analysis: DP, AM, AeF, BB

Investigation: DP, AM, NZ, BB, PT, AW, JK, GABM

Resources: NZ, AW, PT

Visualisation: DP, AM

Supervision: GABM, JK, AW

Writing—original draft: DP, AM, JK, GABM

Writing—review & editing: All authors

**Competing interests:** Authors declare that they have no competing interests.

**Data and materials availability:** Raw reads are available in the NCBI under the project accession number SUB13729399.

869  
870  
871  
872  
873

## Figures and Tables

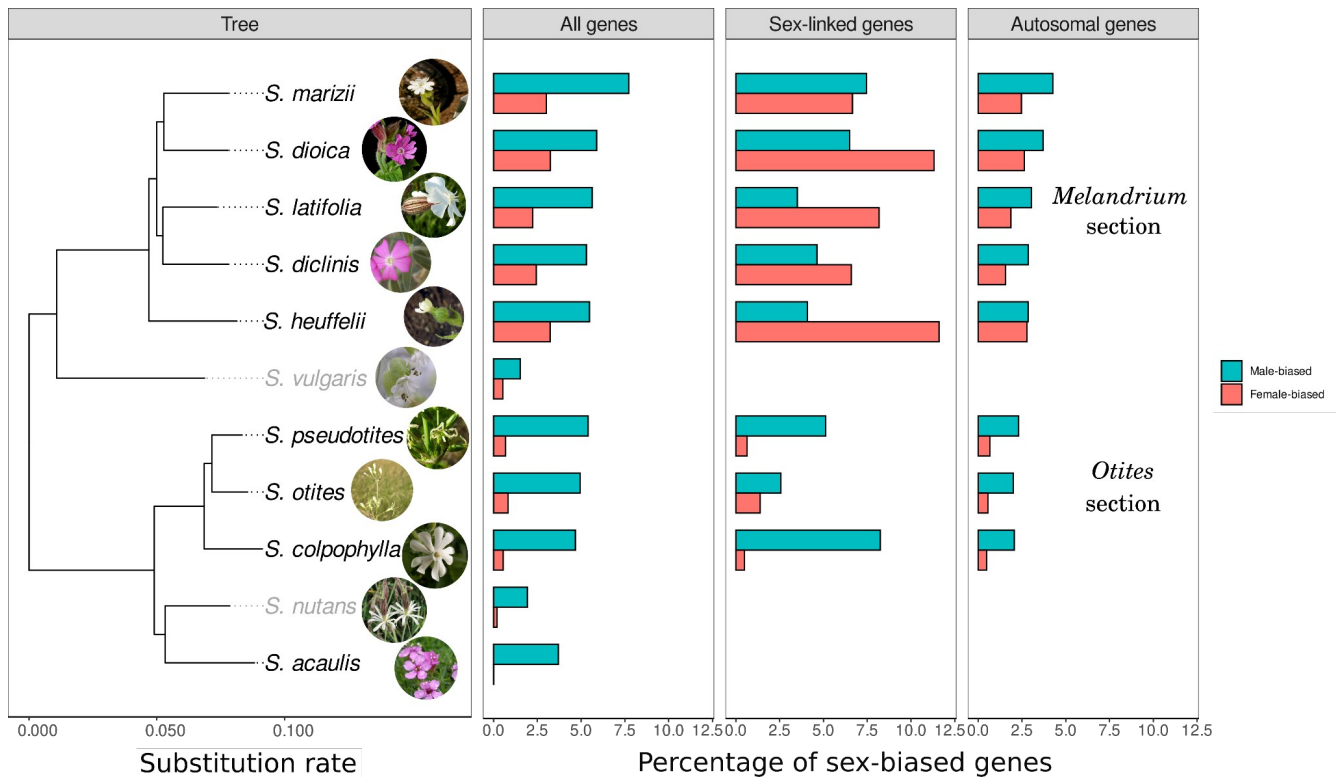

874  
875  
876  
877  
878  
879  
880  
881  
882  
883  
884  
885  
886  
887  
888  
889  
890  
891  
892

**Figure 1:** Phylogenetic reconstruction (left panel) of the eleven *Silene* species used in this study and sex-biased gene proportions in each species (the outgroup *Dianthus chinensis* was removed for this figure, see Supplementary Figure S12 for a complete phylogeny). Gynodioecious and dioecious species names are written in grey and black, respectively. The proportion of expressed genes which are female-biased (red) or male-biased (blue) is shown for different gene subsets: all expressed genes (middle left panel), sex-linked genes (middle right panel, only for Otites and Melandrium sections) autosomal genes (right panel, only for Otites and Melandrium sections). See Supplementary Table S3 for detailed gene numbers. (source of the *S. colpophylla* picture: [www.earth.com](http://www.earth.com)).



893

894

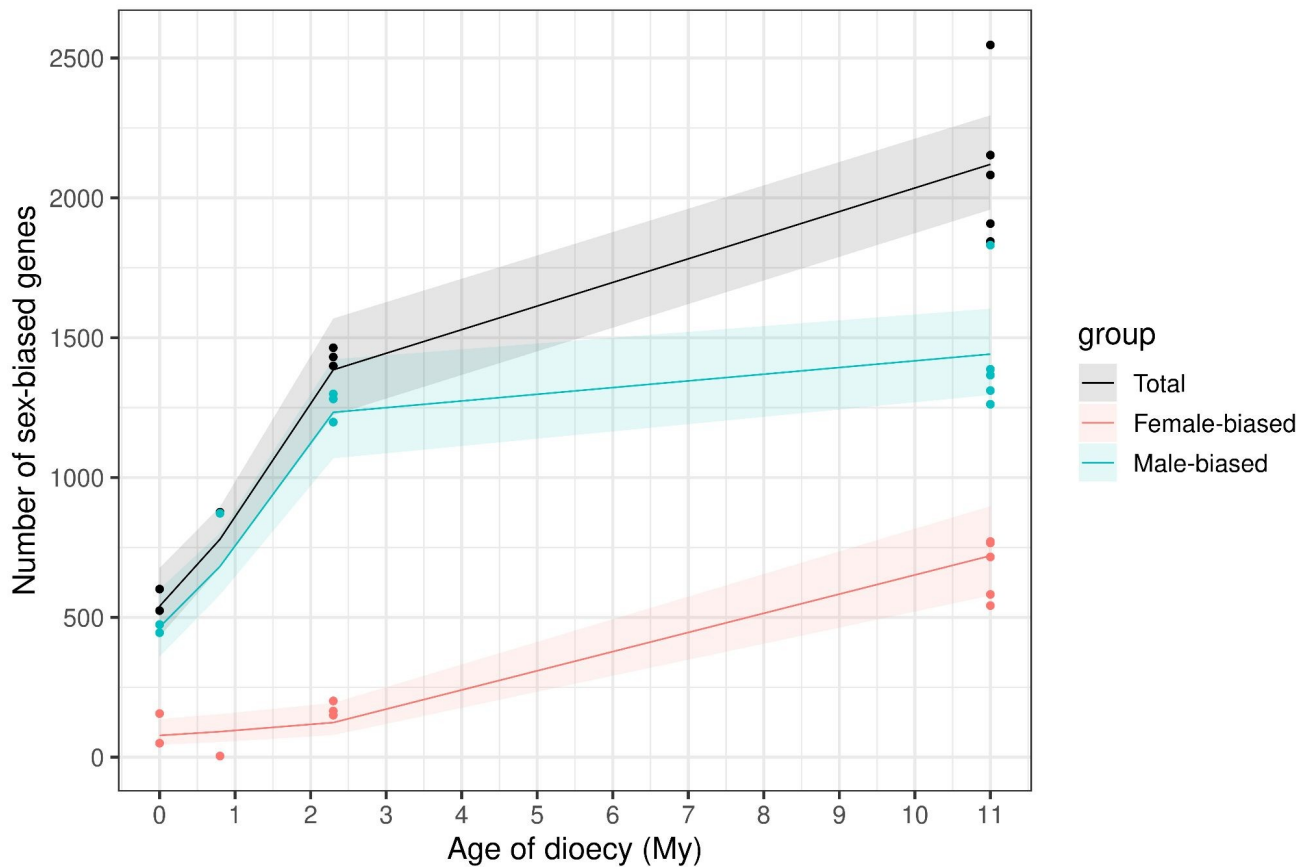

895

896 **Figure 2:** Number of sex biased genes as a function of the age of dioecy (separate sexes) in Million years  
897 (My). Gynodioecious species were plotted with age zero of dioecy, *S. acaulis* with age of dioecy 0.8 My, the  
898 *Otites* section 2.3 My and the *Melandrium* section 11 My. Total sex-biased gene numbers are shown in black,  
899 female-biased genes in red and male-biased genes in blue. Dots show the observed data, lines illustrate the  
900 predicted values by the generalised linear model detailed in Materials and Methods (equations 1 and 2), ribbons  
901 stand for the 95% confidence interval of predicted values. All regressions were significant with  $p < 1 \times 10^{-7}$  and  
902  $R^2 > 0.9$  ( $p$ -values and  $R^2$  of the models can be found in Supplementary Table S4). For total sex-biased and male-  
903 biased genes, the best model included a plateau, specified by a polynomial regression (see Supplementary Table  
904 S4 for details). The number of female-biased genes kept increasing with the age of dioecy without reaching a  
905 plateau.

906

907

908

909

910

911

912

913

**A**

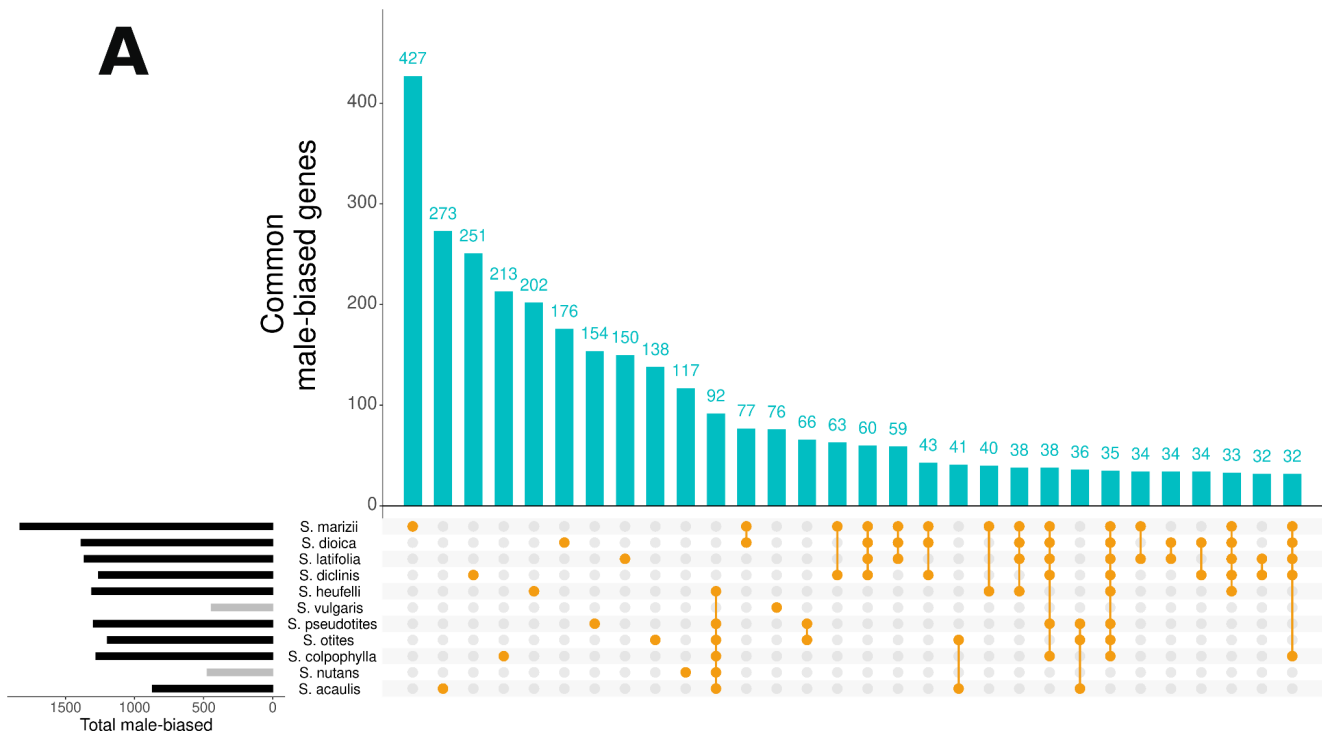

**B**

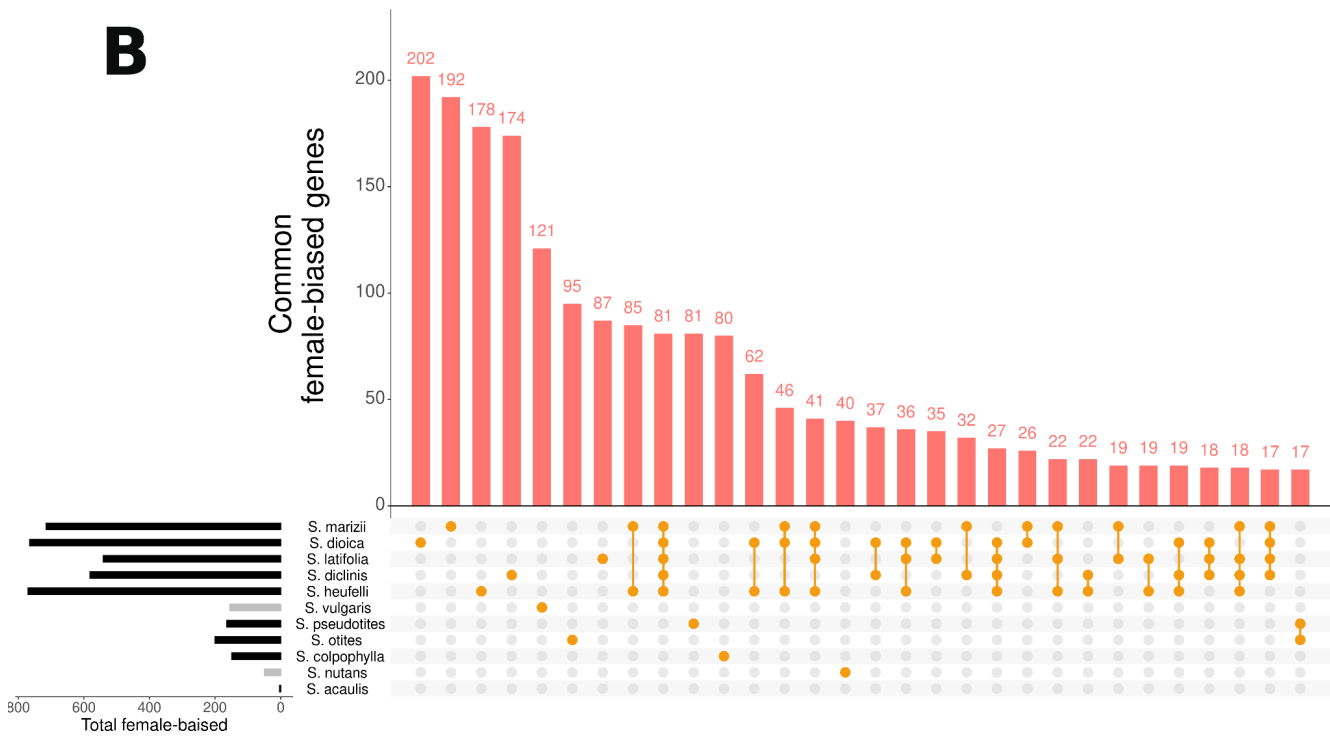

914

915

916 **Figure 3:** Histogram of male-biased genes (A) and female-biased genes (B) indicating the number of genes  
 917 that are unique or shared between several species. The yellow dots under each bar indicate the species in which  
 918 the genes are sex-biased (for example, 192 female-biased genes are unique to *S. marizii* and 85 are shared  
 919 among *S. marizii* and *S.heuffelii*). For both graphs, only the 30 first bars have been represented (see  
 920 Supplementary Figure S13 & S14 for additional data).

921

922

923

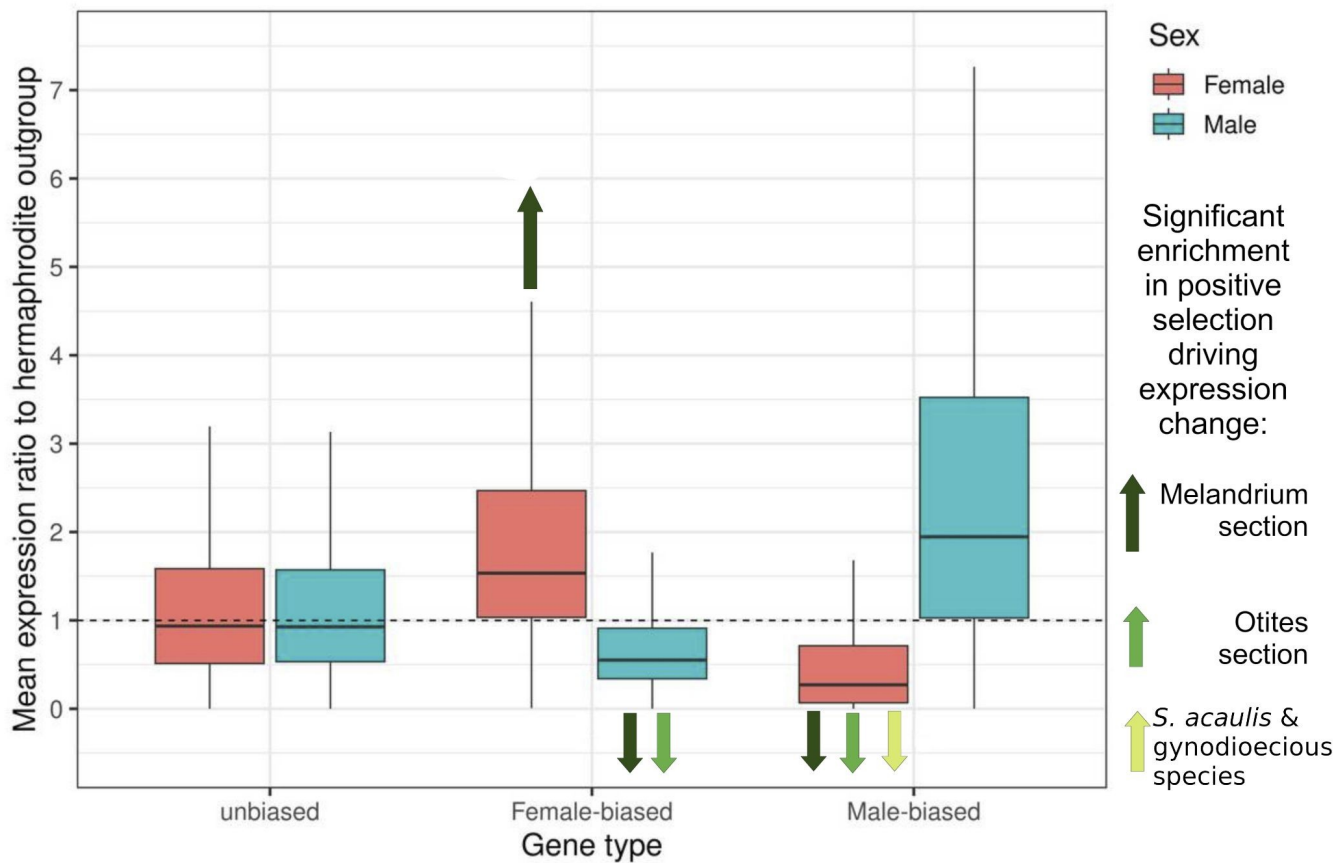

924

925 **Figure 4:** Boxplot of the expression ratio between focal species and their hermaphrodite outgroup. All species  
926 were plotted together (see Supplementary Figure S15 for a plot by groups of species). Values higher than one  
927 indicate higher expression in the focal dioecious species, and values below one lower expression in the focal  
928 species. The arrows summarise the results of the  $\Delta_x$  analysis (Supplementary Tables S7 and S8). Dark-green  
929 arrows indicate that sex-biased genes were significantly enriched in selection for increased or decreased  
930 expression in four species of the *Melandrium* section. Medium-shaded green arrows indicate that sex-biased  
931 genes were significantly enriched in selection for decreased expression in three species of the *Otites* section.  
932 The light-green arrow indicates that male-biased genes were significantly enriched in selection for decreased  
933 female expression in *S. acaulis* and in gynodioecious species.

934

935

936

937

938

939
